# Supplementary material for: Profiling of circulating T-cells with prognostic and predictive value in early and advanced stage PDAC
Source: Research Square preprint supplement (doi:10.21203/rs.3.rs-6914975/v1), 2025-07-02
Supplement: Supplementary file 1 [file 3929c0e364c62f91726e1be0.docx]

**Distinct profiling of circulating T-cells predicts prognosis differently among early and advanced stage PDAC**

Supplementary material

**Supl. Figure 1.** Graphs depicting the persentages of PD-1+ T-cell populations in patients with early and advanced metastatic stage PDAC as well as in healthy donors. n/s: non significant; *: p<0.05; Early: PDAC patients with early stage disease; A/Met: advanced/ metastatic PDAC patients; HD: healthy donors; Teff: T effectors; TCM: central memory T-cells; TEM: effector memory T-cells; Mann-Whitney test.

**Supl. Figure 2.** Graphs depicting the persentages of T-cell populations in patients with early and advanced metastatic stage PDAC as well as in healthy donors. n/s: non significant; Early: PDAC patients with early stage disease; A/Met: advanced/ metastatic PDAC patients; HD: healthy donors; Teff: T effectors; TCM: central memory T-cells; TEM: effector memory T-cells; Mann-Whitney test.

|  | **EARLY STAGE** |  |  | **Disease Free Survival** | | | **Overall Survival** | | |
| --- | --- | --- | --- | --- | --- | --- | --- | --- | --- |
|  | **T-cell populations** | **ROC cut off** |  | **Median (days)** | **95% HR CI** | **p value** | **Median (days)** | **95% CI** | **p value** |
| CD3+CD8+ T-cells | **Tnaive PD-1** | 2.4 | High | 311 | "0.5302 to 7.301" | 0,228 | Und | "0.05434 to 5.028" | 0.589 |
| Low | 422 | Und |
| **Teff PD-1** | 2,8 | High | 422 | "0.08721 to 1.458" | **0.044** | Und | "-1.000 to -1.000" | **0.041** |
| Low | 200 | Und |
| **TCM PD-1** | 28 | High | 366 | "0.2130 to 2.611" | 0.621 | Und | "0.05434 to 5.028" | 0.589 |
| Low | 264 | Und |
| **Tem PD-1** | 37 | High | 311 | "0.3307 to 4.501" | 0.763 | Und | "0.02935 to 3.129" | 0.301 |
| Low | 422 | Und |
| CD3+CD4+ T-cells | **Tnaive PD-1** | 4,4 | High | 264 | "0.8016 to 11.09" | 0,0603 | Und | "0.05165 to 4.774" | 0.559 |
| Low | 599 | Und |
| **Teff PD-1** | 9 | High | 338 | "0.3759 to 4.914" | 0.643 | Und | "0.2095 to 19.36" | 0.559 |
| Low | 264 | Und |
| **TCM PD-1** | 7,5 | High | 224 | "0.8442 to 10.24" | 0.09 | Und | "0.1885 to 17.52" | 0.620 |
| Low | 422 | Und |
| **Tem PD-1** | 11.1 | High | 311 | "0.3467 to 4.198" | 0.767 | Und | "0.1885 to 17.52" | 0.620 |
| Low | 422 | Und |
|  | **METASTATIC** |  |  | **Progresion Free Survival** | | | **Overall Survival** | | |
|  | **T-cell populations** | **ROC cut off** |  | **Median (days)** | **95% HR CI** | **p value** | **Median (days)** | **95% CI** | **p value** |
| CD3+CD8+ T-cells | **Tnaive PD-1** | 2,8 | High | 100 | "0.6891 to 4.745" | 0,182 | 195 | "0.5384 to 3.647" | 0.454 |
| Low | 188 | 250 |
| **Teff PD-1** | 5.9 | High | 330 | "0.1611 to 1.032" | 0.062 | 330 | "0.1885 to 1.270" | 0.140 |
| Low | 109 | 195 |
| **TCM PD-1** | 29 | High | 186 | "0.3576 to 2.322" | 0.832 | 271 | "0.2805 to 1.958" | 0.503 |
| Low | 125 | 210 |
| **Tem PD-1** | 42 | High | 190 | "0.2087 to 1.441" | 0.168 | 250 | "0.3313 to 2.255" | 0.748 |
| Low | 100 | 210 |
| CD3+CD4+ T-cells | **Tnaive PD-1** | 5 | High | 60 | "0.6918 to 6.079" | 0.112 | 180 | "0.5677 to 5.261" | 0.240 |
| Low | 180 | 250 |
| **Teff PD-1** | 8.1 | High | 190 | "0.1448 to 1.039" | **0.030** | 250 | "0.1783 to 1.240" | **0.041** |
| Low | 100 | 170 |
| **TCM PD-1** | 8.3 | High | 100 | "0.4964 to 3.150" | 0.615 | 271 | "0.2539 to 1.808" | 0.374 |
| Low | 180 | 210 |
| **Tem PD-1** | 14.3 | High | 118 | "0.2811 to 1.961" | 0.519 | 210 | "0.2808 to 2.125" | 0.573 |
| Low | 183 | 250 |

**Supl. Table 1.** Associations between different T-cell phenotypes expressing PD-1 and clinical outcomes of chemotherapy-naïve PDAC patients. In red statistically significant correlations. PD-1: programmed cell death receptor 1; Tnaive: CD45RA+CD45RO-CCR7+ Teff: CD45RA+CD45RO-CCR7- ;Tcm: CD45RA-CD45RO+CCR7+; Tem: CD45RA-CD45RO+CCR7-;; ROC: receiver operating characteristic ; HR: hazard ratio, CI: confidence interval estimate.

**Supl. Figure 2.** Graphs depicting the persentages of CD57+ cells on different subsets (A) of CD3+CD4+ and (B) CD3+CD8+ T- cells in patients with early and advanced metastatic stage PDAC as well as in healthy donors. n/s: non significant; *: p<0.05; **:p<0.005, ***: p<0.001; Early: PDAC patients with early stage disease; A/Met: advanced/ metastatic PDAC patients; HD: healthy donors; Mann-Whitney test.

|  | **EARLY STAGE** |  |  | **Disease Free Survival** | | | **Overall Survival** | | |
| --- | --- | --- | --- | --- | --- | --- | --- | --- | --- |
|  | **T-cell populations** | **ROC cut off** |  | **Median (days)** | **95% HR CI** | **p value** | **Median (days)** | **95% CI** | **p value** |
| CD3+CD8+ T-cells | **CD57** | 15 | High | 311 | "0.5081 to 6.111" | 0,2849 | Und | "0.09124 to 11.06" | 0,9971 |
| Low | 422 | Und |
| **CD57 of PD-1** | 4.2 | High | 366 | "0.4146 to 6.384" | 0,5256 | Und | "0.06233 to 9.659" | 0,8354 |
| Low | 264 | Und |
| **CD57 of TCF1** | 5.5 | High | 311 | "0.5541 to 6.745" | 0,2234 | Und | "0.1165 to 12.46" | 0,8787 |
| Low | 422 | Und |
| **CD57 of (PD-1+ TCF1+)** | 88 | High | 422 | "0.1171 to 1.495" | 0,1574 | Und | "0.02588 to 2.930" | 0,2593 |
| Low | 200 | Und |
| **CD57 of (PD-1+ TCF1-)** | 85 | High | 366 | "0.1305 to 1.828" | 0,2367 | Und | "0.02588 to 2.930" | 0,2593 |
| Low | 200 | Und |
| CD3+CD4+ T-cells | **CD57** | 10 | High | 311 | "0.2607 to 3.885" | 0,9924 | Und | "0.1035 to 11.72" | 0,937 |
| Low | 264 | Und |
| **CD57 of PD-1** | 5 | High | 366 | "0.1570 to 2.407" | 0,5263 | Und | "0.1035 to 11.72" | 0,937 |
| Low | 264 | Und |
| **CD57 of TCF1** | 2 | High | 366 | "0.1797 to 3.204" | 0,6796 | Und | "0.04369 to 8.901" | 0,6963 |
| Low | 264 | Und |
| **CD57 of (PD-1+ TCF1+)** | 20 | High | 311 | "0.2806 to 4.058" | 0,921 | Und | "0.1477 to 14.44" | 0,7556 |
| Low | 422 | Und |
| **CD57 of (PD-1+ TCF1-)** | 25 | High | 366 | "0.1401 to 1.914" | 0,2572 | Und | "0.04497 to 4.203" | 0,4832 |
| Low | 264 | Und |
|  | **METASTATIC** |  |  | **Disease Free Survival** | | | **Overall Survival** | | |
|  | **T-cell populations** | **ROC cut off** |  | **Median (days)** | **95% HR CI** | **p value** | **Median (days)** | **95% CI** | **p value** |
| CD3+CD8+ T-cells | **CD57** | 17 | High | 118 | "0.2064 to 1.487" | 0,1783 | 271 | "0.1437 to 1.208" | **0,0381** |
| Low | 92 | 107 |
| **CD57 of PD-1** | 6 | High | 125 | "0.2406 to 1.774" | 0,3433 | 250 | "0.2427 to 1.804" | 0,3565 |
| Low | 109 | 180 |
| **CD57 of TCF1** | 4.5 | High | 118 | "0.1723 to 1.466" | 0,1237 | 250 | "0.1254 to 1.254" | **0,0316** |
| Low | 60 | 90 |
| **CD57 of (PD-1+ TCF1+)** | 91 | High | 260 | "0.1287 to 0.8846" | **0,0063** | 271 | "0.1116 to 0.8066" | **0,003** |
| Low | 60 | 90 |
| **CD57 of (PD-1+ TCF1-)** | 90 | High | 188 | "0.1629 to 1.188" | **0,0459** | 271 | "0.1579 to 1.172" | **0,0429** |
| Low | 80 | 107 |
| CD3+CD4+ T-cells | **CD57** | 6.7 | High | 118 | "0.2741 to 1.675" | 0,6926 | 271 | "0.1824 to 1.121" | **0,042** |
| Low | 93 | 180 |
| **CD57 of PD-1** | 4 | High | 118 | "0.3028 to 1.844" | 0,4929 | 271 | "0.1747 to 1.252" | 0,0873 |
| Low | 121 | 125 |
| **CD57 of TCF1** | 3 | High | 109 | "0.4112 to 2.393" | 0,9852 | 271 | "0.2670 to 1.617" | 0,3225 |
| Low | 121 | 152 |
| **CD57 of (PD-1+ TCF1+)** | 18 | High | 109 | "0.4112 to 2.393" | 0,9852 | 271 | "0.2670 to 1.617" | 0,3225 |
| Low | 121 | 152 |
| **CD57 of (PD-1+ TCF1-)** | 27 | High | 118 | "0.4378 to 2.539" | 0,9017 | 195 | "0.3563 to 2.179" | 0,7656 |
| Low | 92 | 187 |

**Supl. Table 2.** Associations between different T-cell subtypes expressing CD57 and clinical outcomes of chemotherapy-naïve early stage and advanced/ metastatic PDAC patients. In red statistically significant correlations.
